# Supplementary material for: Exposure Patterns Driving Ebola Transmission in West Africa: A Retrospective Observational Study
Source: PLOS journal article supplement (doi:10.1371/journal.pmed.1002170), 2016-11-15
Supplement: S6 (10.1371/journal.pmed.1002170.s006) [file journal.pmed.1002170.s006]

# LIBERIA EBOLA CASE INVESTIGATION FORM

**CASE ID** \_\_\_\_\_  
County ID \_\_\_\_\_ Patient ID \_\_\_\_\_

**Facility ID:** \_\_\_\_\_

**Date of report** MM \_\_\_ DD \_\_\_ YY \_\_\_ **County of report** \_\_\_\_\_

**Village of report** \_\_\_\_\_

**Investigation initiated by** ☐ Case Investigation Team ☐ ETU  
☐ CCC ☐ Burial ☐ Other \_\_\_\_\_

**Patient's surname** \_\_\_\_\_ **Patient's other names** \_\_\_\_\_

**Age (yrs)** \_\_\_\_\_ (0 if <1 y.o.) **Sex** ☐ M ☐ F **Date patient first became sick** MM \_\_\_ DD \_\_\_ YY \_\_\_

**Healthcare worker / Works in health setting** ☐ Y ☐ N ☐ Unk

*If yes, Position* \_\_\_\_\_ *Healthcare facility* \_\_\_\_\_

**Family/friend/immediate contact name** \_\_\_\_\_ **Phone number** \_\_\_\_\_

**Religion** ☐ Christian ☐ Muslim ☐ Atheist ☐ Traditionalist ☐ Other ☐ Unk

**Where patient lives** Village/Town \_\_\_\_\_ Clan/Zone \_\_\_\_\_

District \_\_\_\_\_ County \_\_\_\_\_ Country \_\_\_\_\_

**Where patient first became sick** Village/Town \_\_\_\_\_ Clan/Zone \_\_\_\_\_

District \_\_\_\_\_ County \_\_\_\_\_ Country \_\_\_\_\_

**Ask the patient about the following symptoms if possible, or else ask a close relative or friend**

|                           |                                                                                       |                                         |                                                                                       |
|---------------------------|---------------------------------------------------------------------------------------|-----------------------------------------|---------------------------------------------------------------------------------------|
| Fever                     | <input type="checkbox"/> Yes <input type="checkbox"/> No <input type="checkbox"/> Unk | Joint pain                              | <input type="checkbox"/> Yes <input type="checkbox"/> No <input type="checkbox"/> Unk |
| Vomiting/nausea           | <input type="checkbox"/> Yes <input type="checkbox"/> No <input type="checkbox"/> Unk | Headache                                | <input type="checkbox"/> Yes <input type="checkbox"/> No <input type="checkbox"/> Unk |
| Diarrhea                  | <input type="checkbox"/> Yes <input type="checkbox"/> No <input type="checkbox"/> Unk | Cough                                   | <input type="checkbox"/> Yes <input type="checkbox"/> No <input type="checkbox"/> Unk |
| Intense fatigue/weakness  | <input type="checkbox"/> Yes <input type="checkbox"/> No <input type="checkbox"/> Unk | Difficulty breathing                    | <input type="checkbox"/> Yes <input type="checkbox"/> No <input type="checkbox"/> Unk |
| Anorexia/loss of appetite | <input type="checkbox"/> Yes <input type="checkbox"/> No <input type="checkbox"/> Unk | Difficulty swallowing                   | <input type="checkbox"/> Yes <input type="checkbox"/> No <input type="checkbox"/> Unk |
| Abdominal pain            | <input type="checkbox"/> Yes <input type="checkbox"/> No <input type="checkbox"/> Unk | Hiccups                                 | <input type="checkbox"/> Yes <input type="checkbox"/> No <input type="checkbox"/> Unk |
| Chest pain                | <input type="checkbox"/> Yes <input type="checkbox"/> No <input type="checkbox"/> Unk | Unexplained bleeding                    | <input type="checkbox"/> Yes <input type="checkbox"/> No <input type="checkbox"/> Unk |
| Muscle pain               | <input type="checkbox"/> Yes <input type="checkbox"/> No <input type="checkbox"/> Unk | <i>If yes, list areas of body</i> _____ |                                                                                       |

**Has the patient previously visited a health care facility for this illness?** ☐ Yes ☐ No ☐ Unk

*If yes, dates in facility* MM \_\_\_ DD \_\_\_ YY \_\_\_ to MM \_\_\_ DD \_\_\_ YY \_\_\_

*Facility name* \_\_\_\_\_ *County* \_\_\_\_\_

**Was the case previously a contact? (i.e. followed by contact tracers)** ☐ Yes ☐ No ☐ Unk

**Did the patient contact an ill person in the last 21 days before becoming ill?** ☐ Yes ☐ No ☐ Unk

| Name of source case | Last contact date | County | Village/Town | Status                                                       | Date of Death |
|---------------------|-------------------|--------|--------------|--------------------------------------------------------------|---------------|
|                     | / /               |        |              | <input type="checkbox"/> Alive <input type="checkbox"/> Dead | / /           |
|                     | / /               |        |              | <input type="checkbox"/> Alive <input type="checkbox"/> Dead | / /           |

**Did patient attend a funeral in the last 21 days before becoming ill?** ☐ Yes ☐ No ☐ Unk

*If yes, Name deceased* \_\_\_\_\_ *Funeral date* MM \_\_\_ DD \_\_\_ YY \_\_\_ *Village* \_\_\_\_\_

*County* \_\_\_\_\_ *Did the patient touch or carry the body?* ☐ Yes ☐ No ☐ Unk

**Did patient travel outside their home town in the last 21 days before becoming ill?** ☐ Yes ☐ No ☐ Unk

*If yes, Country of travel* ☐ Liberia ☐ Guinea ☐ Sierra Leone ☐ Other \_\_\_\_\_

*If Liberia, Village* \_\_\_\_\_ *County* \_\_\_\_\_ *Dates* MM \_\_\_ DD \_\_\_ YY \_\_\_ to MM \_\_\_ DD \_\_\_ YY \_\_\_

**Patient** ☐ Admitted to ETU ☐ Admitted to CCC *if yes ETU/CCC name* \_\_\_\_\_ *on* MM \_\_\_ DD \_\_\_ YY \_\_\_

**current** ☐ Awaiting transportation to ETU or CCC

**status** ☐ Refused to go to an ETU or CCC because \_\_\_\_\_

☐ Dead *If dead, Date of death* MM \_\_\_ DD \_\_\_ YY \_\_\_ ☐ Not applicable

**Epidemiological case classification** ☐ Suspected ☐ Probable ☐ Not a case ☐ Unknown

**Other comments**

Completed By \_\_\_\_\_ Phone number \_\_\_\_\_ Position \_\_\_\_\_

**RETURN COMPLETED FORM TO THE COUNTY HEALTH TEAM - Date received** MM \_\_\_ DD \_\_\_ YY \_\_\_

Form 11/30/2014

REQUIRED FIELDS

## CONTACT LISTING FORM

| County ID | Patient ID |
|-----------|------------|
|-----------|------------|

| Surname | Other Names | Sex | County of Residence | Clan/Zone | Village/Town | Date Illness Onset | Date of Isolation | Date of Death |
|---------|-------------|-----|---------------------|-----------|--------------|--------------------|-------------------|---------------|
|         |             |     |                     |           |              |                    |                   |               |
|         |             |     |                     |           |              |                    |                   |               |

**\*\*For all information on location, please list information on where the contact will be residing for the next month.**

[illegible]

3= Touched or shared the linens, clothes, or dishes/eating utensils of the case; 4 = Slept, ate, or spent time in the same household or room as the case; 5=no direct contact reported, but need to be followed

|                                 |                         |       |          |       |
|---------------------------------|-------------------------|-------|----------|-------|
| <b>Total number of contacts</b> | Contact Sheet Filled by | Name  | Position | Phone |
| _____                           |                         | _____ | _____    | _____ |

**RETURN THIS COMPLETED FORM TO THE COUNTY HEALTH TEAM - Date Received MM DD YY**

# LIBERIA EBOLA CASE INVESTIGATION PACKAGE

## PATIENT OUTCOME FORM

CASE ID \_\_\_\_\_ - \_\_\_\_\_  
County ID Patient ID

### ***FILL OUT THIS SECTION AND GIVE TO ETU/CCC***

Patient's surname \_\_\_\_\_ Patient's other names \_\_\_\_\_

Age (yrs) \_\_\_\_\_ (0 if <1y.o.) Sex ☐ M ☐ F

Where patient lives Village/Town \_\_\_\_\_ Clan/Zone \_\_\_\_\_

District \_\_\_\_\_ County \_\_\_\_\_ Country \_\_\_\_\_

Family/Friend/Immediate contact name \_\_\_\_\_ Phone number \_\_\_\_\_

Investigator name \_\_\_\_\_ Investigator phone number \_\_\_\_\_

Date outcome information completed MM\_\_\_\_ DD\_\_\_\_ YY\_\_\_\_

Final status of patient ☐ Discharged/Recovered ☐ Dead

☐ Discharged/Never tested positive ☐ Discharged/Triage (no testing)

### **If patient recovered and discharged**

Hospital/Ebola Treatment Unit discharged from \_\_\_\_\_

County \_\_\_\_\_ Date of discharge MM\_\_\_\_ DD\_\_\_\_ YY\_\_\_\_

### **If patient is dead**

Date of death MM\_\_\_\_ DD\_\_\_\_ YY\_\_\_\_

Place of death ☐ Community location ☐ ETU ☐ CCC ☐ Hospital ☐ Specify location name \_\_\_\_\_

Date of burial MM\_\_\_\_ DD\_\_\_\_ YY\_\_\_\_ Burial conducted by ☐ Family/Community ☐ Burial Team

Completed By \_\_\_\_\_ Phone number \_\_\_\_\_ Affiliation ☐ CIT ☐ Burial team

☐ ETU ☐ CCC

Form 11/25/2014

***Keep this form at location where patient is isolated (e.g. hand to ambulance driver).***

***Fill out at time of patient's recovery and discharge OR at time of patient's death.***

**Once patient outcome known, return to County Health Team**

**LIBERIA EBOLA CASE INVESTIGATION PACKAGE****LABORATORY SAMPLE SUBMISSION FORM**

|                       |                  |
|-----------------------|------------------|
| CASE ID _____ - _____ |                  |
| County ID _____       | Patient ID _____ |

Complete this section when sample is collected

Patient's surname \_\_\_\_\_ Patient's other names \_\_\_\_\_  
 Age (yrs) \_\_\_\_\_ (0 if <1y.o.) Sex ☐ M ☐ F  
 Where patient lives Village/Town \_\_\_\_\_ Clan/Zone \_\_\_\_\_  
 District \_\_\_\_\_ County \_\_\_\_\_ Country \_\_\_\_\_  
 Sample submitted by \_\_\_\_\_ (name) from \_\_\_\_\_ (facility)  
 Affiliation ☐ Community case investigator/County ☐ ETU ☐ CCC ☐ Burial team ☐ Other \_\_\_\_\_  
 Sample type ☐ Whole blood ☐ Swab ☐ Postmortem heart blood ☐ Other \_\_\_\_\_  
 Reason for testing ☐ Diagnosis ☐ Readiness for discharge  
 Date collected MM\_\_\_\_ DD\_\_\_\_ YY\_\_\_\_ Date submitted MM\_\_\_\_ DD\_\_\_\_ YY\_\_\_\_  
 Send results to \_\_\_\_\_ (name) from \_\_\_\_\_ (facility)  
 Phone number \_\_\_\_\_ Email \_\_\_\_\_

**To be completed by Laboratory****Laboratory** \_\_\_\_\_

Date received MM\_\_\_\_ DD\_\_\_\_ YY\_\_\_\_ Sample ID# \_\_\_\_\_  
 Date tested MM\_\_\_\_ DD\_\_\_\_ YY\_\_\_\_  
 Result Interpretation ☐ Positive ☐ Negative ☐ Indeterminate  
 Other Test \_\_\_\_\_ Results \_\_\_\_\_  
 \_\_\_\_\_ ☐ Positive ☐ Negative ☐ Indeterminate  
 \_\_\_\_\_ ☐ Positive ☐ Negative ☐ Indeterminate

Form 11/27/2014

**LIBERIA EBOLA CASE INVESTIGATION PACKAGE****LABORATORY SAMPLE SUBMISSION FORM**

|                       |                  |
|-----------------------|------------------|
| CASE ID _____ - _____ |                  |
| County ID _____       | Patient ID _____ |

Complete this section when sample is collected

Patient's surname \_\_\_\_\_ Patient's other names \_\_\_\_\_  
 Age (yrs) \_\_\_\_\_ (0 if <1y.o.) Sex ☐ M ☐ F  
 Where patient lives Village/Town \_\_\_\_\_ Clan/Zone \_\_\_\_\_  
 District \_\_\_\_\_ County \_\_\_\_\_ Country \_\_\_\_\_  
 Sample submitted by \_\_\_\_\_ (name) from \_\_\_\_\_ (facility)  
 Affiliation ☐ Community case investigator/County ☐ ETU ☐ CCC ☐ Burial team ☐ Other \_\_\_\_\_  
 Sample type ☐ Whole blood ☐ Swab ☐ Postmortem heart blood ☐ Other \_\_\_\_\_  
 Reason for testing ☐ Diagnosis ☐ Readiness for discharge  
 Date collected MM\_\_\_\_ DD\_\_\_\_ YY\_\_\_\_ Date submitted MM\_\_\_\_ DD\_\_\_\_ YY\_\_\_\_  
 Send results to \_\_\_\_\_ (name) from \_\_\_\_\_ (facility)  
 Phone number \_\_\_\_\_ Email \_\_\_\_\_

**To be completed by Laboratory****Laboratory** \_\_\_\_\_

Date received MM\_\_\_\_ DD\_\_\_\_ YY\_\_\_\_ Sample ID# \_\_\_\_\_  
 Date tested MM\_\_\_\_ DD\_\_\_\_ YY\_\_\_\_  
 Result Interpretation ☐ Positive ☐ Negative ☐ Indeterminate  
 Other Test \_\_\_\_\_ Results \_\_\_\_\_  
 \_\_\_\_\_ ☐ Positive ☐ Negative ☐ Indeterminate  
 \_\_\_\_\_ ☐ Positive ☐ Negative ☐ Indeterminate

Form 11/27/2014

**FORM TO BE SENT WITH SAMPLE TO LAB**

### **Instructions for Case Investigation Completion and Form Submission**

## Completing the Case Investigation Form

- ## What to do with the Case Investigation Package

- Any questions or requests for user registration should be directed to the county health team.

[illegible]
